# Supplementary material for: GC Insights: Enhancing inclusive engagement with the geosciences through art-science collaborations
Source: Copernicus journal article supplement (doi:10.5194/egusphere-2022-357), 2022-08-18
Supplement: Supplementary file [file egusphere-2022-357-RC1-supplement.pdf]

Gc. 2022-357

*GC Insights: Enhancing inclusive engagement with the geosciences through art-science collaborations*

Wright et al.

The research presented in this GC Insight is conducted with a limited sample: a small group of participants. This is not immediately clear from the article, and become evident only in the supplement. In the end, the semi-structured interviews are conducted with three participants (an artist, an exhibition officer and a scientist/artist). Nevertheless, the lesson learned, obtained also with the help of the other few participants, are interesting and can provide a useful guideline for art-science collaborations in the environmental geosciences.

The other important aspect comes out from the case studies, and I believe it is not enough emphasized in the article: integrating Art in “unusual” context as can be a Museum of Natural History (case #1) or in a political context (case #2) can contribute in engaging with geosciences in a powerful way? (It is inspiring, for instance, what Kurt Jackson answer to *how do people respond to the works*: “And for ‘Biodiversity’, we get some lovely responses from the audiences. They’ve been sending things that they’ve made themselves; it never occurred to me that audiences might respond in this way.”)

I believe this aspect is worth to be explored more in depth. So if the authors have elements to develop more this aspect I would suggest them to organize the article around it. (see for instance Natasha Smith answer to *What are the key reflections and takeaways from the ‘Biodiversity’ exhibition?*)

**Specific comments:**

10-11 I suggest: “Here we present two cases studies as examples of how co-creating approaches for reaching wider audiences...”

41-42 Please make immediately clear that people interviewed are three.

66-80 This is a repetition of what already summarized in the supplement

98 (Fig. S2 in the supplement)

Par 4 should be reorganized. Rather than being a collection of references to other works, it should summarize and discuss what your team has achieved in collaborating and co-creating, what can be further explored, and the limits of your work (if there are).
